# Supplementary material for: 15-cis-Phytoene Desaturase and 15-cis-Phytoene Synthase Can Catalyze the Synthesis of β-Carotene and Influence the Color of Apricot Pulp
Source: MDPI journal article supplement (doi:10.3390/foods13020300), 2024-01-17
Supplement: s1 [file s1]

# Supplementary Data

## For

### 15-*cis*-Phytoene Desaturase and 15-*cis*-Phytoene Synthase Can Catalyze the Synthesis of $\beta$ -Carotene and Influence the Color of Apricot Pulp

Ningning Gou <sup>1</sup>, Xuchun Zhu <sup>2</sup>, Mingyu Yin <sup>1,3</sup>, Han Zhao <sup>1</sup>, Haikun Bai <sup>1</sup>, Nan Jiang <sup>1</sup>, Wanyu Xu <sup>1</sup>, Chu Wang <sup>1</sup>, Yujing Zhang <sup>1</sup> and Tana Wuyun <sup>1,\*</sup>

<sup>1</sup> Kernel-Apricot Engineering and Technology Research Center of State Forestry and Grassland Administration, Research Institute of Non-Timber Forestry, Chinese Academy of Forestry, State Key Laboratory of Tree Genetics and Breeding, Zhengzhou 450003, China

<sup>2</sup> School of Food and Health, Beijing Technology and Business University, Beijing 100037, China

<sup>3</sup> Institute of Ecological Conservation and Restoration, Chinese Academy of Forestry, Key Laboratory of Desert Ecosystem and Global Change, National Forestry and Grassland Administration, Beijing 100091, China

\* Correspondence: wuyuntana@caf.ac.cn

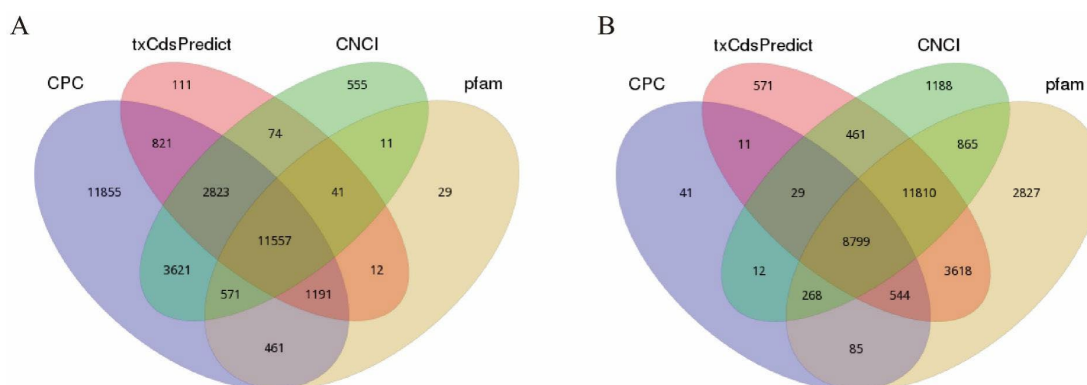

**Supplementary Figure S1.** The Venn diagram shows the transcriptome coding ability predicted by CPC, txcdspredict, CNCI, and Pfam databases. **A.** predicted result Venn Diagram-lncRNA. **B.** predicted result Venn Diagram-mRNA.

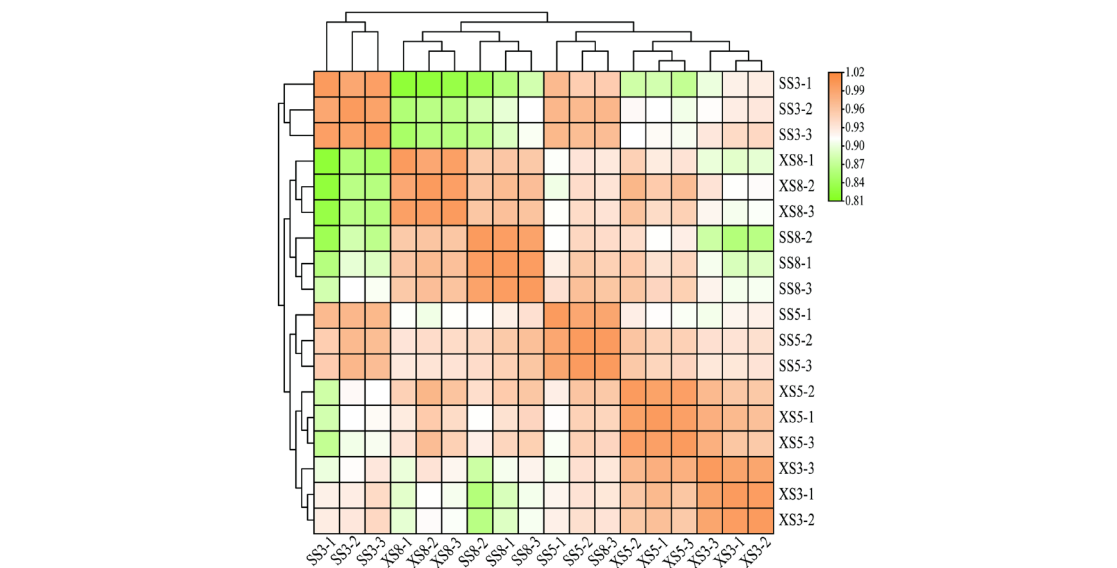

**Supplementary Figure S2.** Correlation clustering heat maps of different comparison groups.

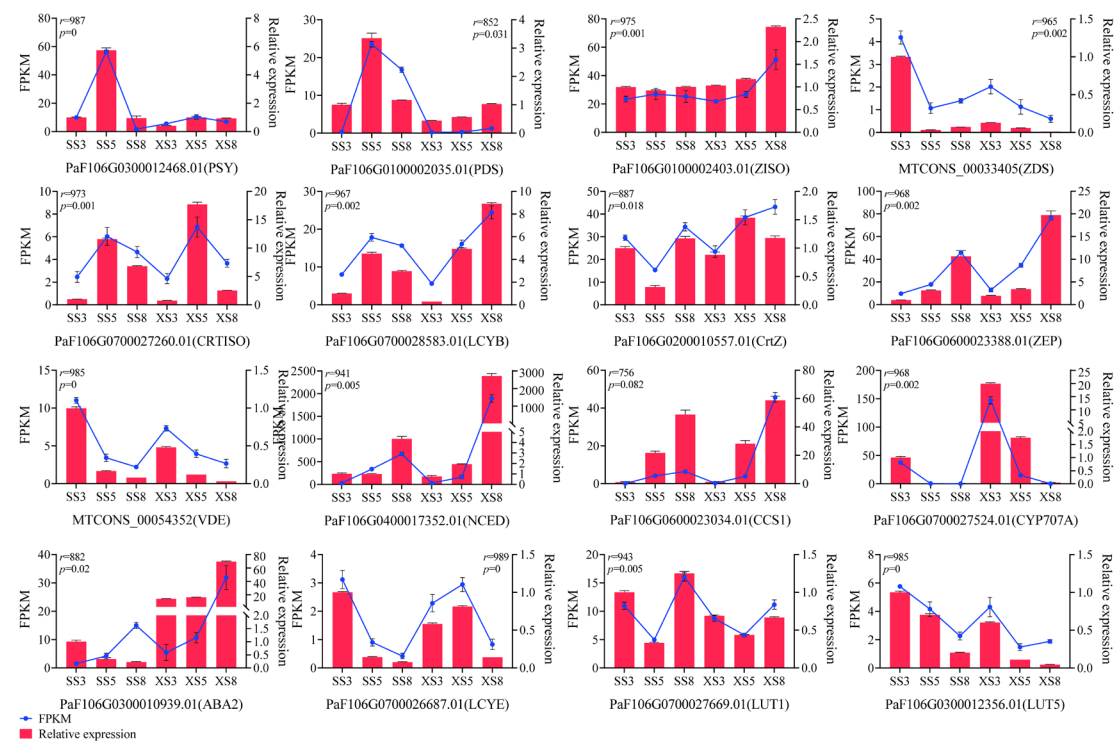

**Supplementary Figure S3.** Expression analysis of 16 differentially expressed mRNAs by qRT-PCR in orange and white apricot during S3, S5 and S8 stage. Columns and lines indicate qRT-PCR and RNA-seq of the candidate differentially expressed genes, respectively. The Pearson correlation coefficient is denoted by r, and sample significance is denoted by P.

**Table S1.** Experimental sample information.

| Number | Cultivar              | Pulp color | Sampling position | Sampling stage |
|--------|-----------------------|------------|-------------------|----------------|
| OFF1   | yuxing                | Orange     |                   | mature stage   |
| OFF2   | shenyangdashuaiyuxing | Orange     |                   | mature stage   |
| OFF3   | qingyangxing          | Orange     |                   | mature stage   |

|       |                       |        |                    |                        |
|-------|-----------------------|--------|--------------------|------------------------|
| OFP4  | ningxiandajiexing     | Orange |                    | mature stage           |
| OFP5  | JTY                   | Orange |                    | 9 developmental stages |
| OFP6  | jinshahong            | Orange |                    | mature stage           |
| OFP7  | erhongbadanxing       | Orange |                    | mature stage           |
| OFP8  | dongxing              | Orange |                    | mature stage           |
| OFP9  | chuanzhihongyouxi     | Orange |                    | mature stage           |
| OFP10 | X12                   | Orange |                    | mature stage           |
| OFP11 | 31-2-6-11             | Orange |                    | mature stage           |
| OFP12 | 11Z05                 | Orange |                    | mature stage           |
| OFP13 | 11N02                 | Orange |                    | mature stage           |
| OFP14 | 11D02                 | Orange |                    | mature stage           |
| OFP15 | 1-16-11-1             | Orange |                    | mature stage           |
| OFP16 | 10-10-21-6            | Orange | the experimental   | mature stage           |
| OFP17 | 20191008              | Orange | field of the       | mature stage           |
| OFP18 | 20191007              | Orange | Research Institute | mature stage           |
| OFP19 | 20191006              | Orange | of Non-timber      | mature stage           |
| OFP20 | 20190199              | Orange | Forestry in        | mature stage           |
| OFP21 | 2018001               | Orange | Yuanyang           | mature stage           |
| WFP1  | zhenxing34            | White  | County, Henan      | mature stage           |
| WFP2  | yuanyangbaixing       | White  | Province, China    | mature stage           |
| WFP3  | qiu hong              | White  |                    | mature stage           |
| WFP4  | luntailhao            | White  |                    | mature stage           |
| WFP5  | XX15                  | White  |                    | mature stage           |
| WFP6  | X15                   | White  |                    | 9 developmental stages |
| WFP7  | SS010                 | White  |                    | mature stage           |
| WFP8  | RV                    | White  |                    | mature stage           |
| WFP9  | PT54                  | White  |                    | mature stage           |
| WFP10 | PT15                  | White  |                    | mature stage           |
| WFP11 | LS-11                 | White  |                    | mature stage           |
| WFP12 | F70                   | White  |                    | mature stage           |
| WFP13 | F40                   | White  |                    | mature stage           |
| WFP14 | F31                   | White  |                    | mature stage           |
| WFP15 | 77hangdi25ke          | White  |                    | mature stage           |
| WFP16 | 64hangdi2ke           | White  |                    | mature stage           |
| WFP17 | 38-ningxiandajiexing  | White  |                    | mature stage           |
| WFP18 | mengzhoujiaxiaibaxing | White  |                    | mature stage           |
| WFP19 | 11Z17                 | White  |                    | mature stage           |
| WFP20 | 20191004              | White  |                    | mature stage           |
| WFP21 | 12099                 | White  |                    | mature stage           |
| WFP22 | 12079                 | White  |                    | mature stage           |

---

**Table S2.** Whole transcriptome sequencing data filtering statistics.

| Sample | TotalRawReads | TotalClean<br>Reads | TotalCleanBase | GCofFq1 | GCofFq2 | Q20ofFq1 | Q20ofFq2 | Q30ofFq1 | Q30ofFq2 | CleanReads<br>Ratio | TotalMappin<br>gRatio | UniquelyMa<br>ppingRatio | StrandSpecif<br>icRatio |
|--------|---------------|---------------------|----------------|---------|---------|----------|----------|----------|----------|---------------------|-----------------------|--------------------------|-------------------------|
| SS1-1  | 112988812     | 112004560           | 11200456000    | 47.33%  | 47.69%  | 98.06%   | 97.72%   | 93.91%   | 92.55%   | 99.13%              | 74.20%                | 71.17%                   | 92.94%                  |
| SS1-2  | 127539558     | 126293984           | 12629398400    | 47.47%  | 47.79%  | 97.98%   | 98.05%   | 93.71%   | 93.57%   | 99.02%              | 74.57%                | 71.64%                   | 95.03%                  |
| SS1-3  | 129383592     | 127986180           | 12798618000    | 47.73%  | 48.07%  | 98.03%   | 97.96%   | 93.84%   | 93.32%   | 98.92%              | 73.55%                | 70.43%                   | 94.66%                  |
| SS2-1  | 129383592     | 128177864           | 12817786400    | 48.05%  | 48.36%  | 97.95%   | 97.98%   | 93.59%   | 93.28%   | 99.07%              | 78.09%                | 75.11%                   | 96.34%                  |
| SS2-2  | 129383592     | 128225318           | 12822531800    | 48.18%  | 48.50%  | 97.93%   | 97.96%   | 93.61%   | 93.23%   | 99.11%              | 78.21%                | 75.24%                   | 96.39%                  |
| S2-3   | 129383592     | 128024968           | 12802496800    | 47.82%  | 48.21%  | 97.96%   | 98.02%   | 93.72%   | 93.51%   | 98.95%              | 78.07%                | 75.19%                   | 96.40%                  |
| SS3-1  | 129383592     | 128165018           | 12816501800    | 48.67%  | 48.87%  | 98.02%   | 97.91%   | 93.83%   | 93.16%   | 99.06%              | 79.77%                | 76.64%                   | 95.93%                  |
| SS3-2  | 129383592     | 128126212           | 12812621200    | 48.62%  | 48.87%  | 98.07%   | 98.07%   | 94.01%   | 93.70%   | 99.03%              | 79.75%                | 76.70%                   | 96.20%                  |
| SS3-3  | 129383592     | 128244312           | 12824431200    | 48.68%  | 48.95%  | 97.93%   | 98.10%   | 93.54%   | 93.71%   | 99.12%              | 79.79%                | 76.60%                   | 95.94%                  |
| XS1-1  | 129383592     | 128132296           | 12813229600    | 47.52%  | 47.85%  | 97.99%   | 98.09%   | 93.71%   | 93.64%   | 99.03%              | 74.68%                | 71.63%                   | 92.52%                  |
| XS1-2  | 127435434     | 126004654           | 12600465400    | 47.63%  | 47.99%  | 97.70%   | 96.91%   | 94.12%   | 92.33%   | 98.88%              | 73.35%                | 70.16%                   | 92.83%                  |
| XS1-3  | 123623084     | 122030400           | 12203040000    | 48.03%  | 48.38%  | 97.87%   | 97.04%   | 94.57%   | 92.68%   | 98.71%              | 72.59%                | 69.27%                   | 93.19%                  |
| XS2-1  | 121671572     | 120578976           | 12057897600    | 47.88%  | 48.25%  | 98.06%   | 98.06%   | 94.01%   | 93.62%   | 99.10%              | 77.71%                | 74.55%                   | 95.67%                  |
| XS2-2  | 129934168     | 128221742           | 12822174200    | 48.30%  | 48.63%  | 97.62%   | 97.17%   | 94.01%   | 92.96%   | 98.68%              | 76.02%                | 72.88%                   | 95.68%                  |
| XS2-3  | 129934168     | 128165600           | 12816560000    | 48.33%  | 48.70%  | 97.70%   | 97.26%   | 94.21%   | 93.24%   | 98.64%              | 75.14%                | 71.92%                   | 95.66%                  |
| XS3-1  | 129383592     | 127630892           | 12763089200    | 48.60%  | 48.76%  | 98.01%   | 98.15%   | 93.85%   | 93.93%   | 98.65%              | 80.97%                | 77.75%                   | 97.60%                  |
| XS3-2  | 129934168     | 127527340           | 12752734000    | 49.11%  | 49.25%  | 97.76%   | 97.01%   | 94.38%   | 92.68%   | 98.15%              | 78.27%                | 74.86%                   | 97.13%                  |
| XS3-3  | 129934168     | 127919182           | 12791918200    | 48.73%  | 48.90%  | 97.85%   | 96.80%   | 94.53%   | 92.08%   | 98.45%              | 79.54%                | 76.13%                   | 97.56%                  |

**Table S3.** Primers used in this study.

| Gene                 | Primer forward(F)        | Primer reverse(R)        | Use                      |
|----------------------|--------------------------|--------------------------|--------------------------|
| PaF106G0700028583.01 | TTGCTCGATTGACCCGTCTC     | ACCAGACCAGGTAGTGTCCA     | qPCR                     |
| PaF106G0700027669.01 | CTCTGAGCTTCTGGGTGGTG     | ACCACGAAGTTTCTAGGCCC     |                          |
| PaF106G0700027524.01 | GGATGTTACCCGGAAC TTGG    | CATACCTGTTTTGCCTAGTGGC   |                          |
| PaF106G0700027260.01 | ATGGGACGCTCTGGTCATTG     | ACCGAGAGAACTTGAAGCCG     |                          |
| PaF106G0700026687.01 | ATGCAAGCATGGAACACCCT     | CCAAGGAAACCCTGCCACAT     |                          |
| PaF106G0600023388.01 | TCGTTGCCTCCAATGGTGAT     | TGTTCTTGGGTCTCAATAGCAGTG |                          |
| PaF106G0600023034.01 | TCCTTCCAAAGCCCAGAGCA     | GTGCCGATGATGATCACGTC     |                          |
| PaF106G0400017352.01 | TTTACTACAGAAAGCGGCAGC    | TTTTGGGAAGTGGGTTTTGG     |                          |
| PaF106G0300012468.01 | GAACAGAGCAGGGTCAAGGAG    | CTTGGCATATTCAAGCACAGACC  |                          |
| PaF106G0300012356.01 | TATGCGATTCCCTGCTGGGAC    | TCGAAACCAGCCCATCCTTC     |                          |
| PaF106G0300010939.01 | GAAGAAGCAGGCTAGAAGGCAA   | CCTTGTTGGATGAACTCGTGG    |                          |
| PaF106G0200010557.01 | GGAAGCACTGTTTCACTGTCTATG | GACAACCTTCTCAGCCACACGTAC |                          |
| PaF106G0100002403.01 | GGCCCAATGTTGCTCCCTAT     | CAGGGCTTGTGCATTTTGCT     |                          |
| PaF106G0100002035.01 | TACGAAACACTCCCAGATGCG    | ACCATTCCTCGGCCTTCCAT     |                          |
| MTCONS_00054352      | ACCCATCATGTGCTGCCAAT     | TCCCACATCAGATTTCTTGGGTA  |                          |
| MTCONS_00033405      | GAGCATTGAGGGATGTACGGA    | AGAGAAGTAAGTGCTAGGCCG    |                          |
| LTCONS_00065464      | GGGTGCCATTTTATAGAGGGAAG  | AGGAAAGCAAGCTGAAGTAGCC   |                          |
| LTCONS_00056403      | CTGAAGGATTGACAAGCCCG     | AGTGAAGAGGGTTTTGGAGGC    |                          |
| LTCONS_00051642      | CCATCTCTTTTGGCACCAGTC    | CATGCACCCTATGACACCTGAT   |                          |
| LTCONS_00032302      | AGCACAGACCTCACCACATCG    | TGGACTTGGATGAACGGATTG    |                          |
| ACT                  | ACATTGTTCTTAGTGGTGGGTC   | AGATTCGTCATACTCTGCCTTT   |                          |
| PaPSY                | ATGTGCAAGGAGGAATCAAT     | CCCCAGTTGAAAAAGTCAGC     | <u>promoter activity</u> |

|                |                                                   |                                                               |                |
|----------------|---------------------------------------------------|---------------------------------------------------------------|----------------|
| pBI121_PaPSY   | tgacatgattacgccTTCAAT<br>GTGCAAGGAGGAATC          | taagggactgaccacccCTCAGA<br>AGAAAGGCAAGACT                     |                |
| X15-PaPDS      | CCATTTAAGGGTGCTGGTAAAC                            | CACTTAAAAGAGGACTCCTGCTA                                       | Overexpression |
| pBWA_X15-PaPDS | acggcatggacgagctctacATGTCT<br>CAGTGGGCTTGTGTCTCTG | tgaagacagagctagttacaTTAAGTAAATTC<br>AGACATAGATGAGCATGCGTGTTTC |                |
| JTY-PaPDS      | CCATTTAAGGGTGCTGGTAAAC                            | CACTTAAAAGAGGACTCCTGCTA                                       |                |
| pBWA_JTY-PaPDS | acggcatggacgagctctacATGTCT<br>CAGTGGGCTTGTGTCTCTG | tgaagacagagctagttacaTTAAGTAAATT<br>CAGACATAGATGAGCATGCGTGTTTC |                |
| TRVII_PaPSY    | tgagtaagggtaccgaattcAGCC<br>CAGAATCAAAGGCTTCA     | ggacatgcccgggcctcgagCCA<br>CACTGGCCATCTACTAGC                 | VIGS           |
| TRVII_PaPDS    | tgagtaagggtaccgaattcTCCCGA<br>ATACAGAAAATTGAGCTA  | ggacatgcccgggcctcgagACAT<br>GTTACAGACATGTCAGCA                |                |
